# Supplementary material
Source: PubMed Central journal article supplement (PMC8286330)
Supplement: NIHMS1706771-supplement-2.pdf [file NIHMS1706771-supplement-2.pdf]

**Table S1.** Summary of electron microscopy of replication intermediates (related to Figures 1 and 5). Percentage of reversed forks and number of replication intermediates scored per sample is shown.

| <b>Related to Figure 1</b> |                |                                |               |
|----------------------------|----------------|--------------------------------|---------------|
| <b>No added stress</b>     | <b>Control</b> | <b>RADX<math>\Delta</math></b> | <b>siRADX</b> |
| Experiment 1               | 11% (82)       | 18% (91)                       | 21% (91)      |
| Experiment 2               | 11% (75)       | 22% (83)                       | 23% (88)      |
| Experiment 3               | 10% (81)       | 23% (77)                       | 24% (76)      |
| <b>Related to Figure 5</b> |                |                                |               |
| <b>5h HU (3mM)</b>         | <b>Control</b> | <b>RADX<math>\Delta</math></b> | <b>siRADX</b> |
| Experiment 1               | 28% (75)       | 16% (97)                       | 21% (97)      |
| Experiment 2               | 25% (84)       | 18% (70)                       | 19% (78)      |
| Experiment 3               | 21% (95)       | 10% (76)                       |               |
| Experiment 4               | 25% (77)       | 18% (85)                       | 19% (86)      |
