# Supplementary material
Source: PubMed Central journal article supplement (PMC8286330)
Supplement: NIHMS1706771-supplement-3.pdf [file NIHMS1706771-supplement-3.pdf]

| <b>Table S2.</b> Oligonucleotides used in this study (related to Figure 7). |                                                                                                                                              |
|-----------------------------------------------------------------------------|----------------------------------------------------------------------------------------------------------------------------------------------|
| Lead 122                                                                    | CGTGACTTGATGTTAACCCTAACCCCTAAGATATCGCGT <u>T</u> ATCAGAGTGTGAGG<br>ATACATGTAGGCAATTGCCACGTGTCTATCAGCTGAAGTTGTTGCGGACGTGC<br>GATCGTCGCTGCGACG |
| Lag122                                                                      | CGTCGCAGCGACGATCGCACGTGCGGAACAACCTTCAGCTGATAGACACGTGG<br>CAATTGCCTACATGTATCCTCACACTCTGA <u>A</u> TACGCGATATCTTAGGGTTAGG<br>GTTAACATCAAGTCACG |
| Lag82                                                                       | TCAGAGTGTGAGGATACATGTAGGCAATTGCCACGTGTCTATCAGCTGAAGTT<br>GTTGCGGACGTGCGATCGTCGCTGCGACG                                                       |
